# Supplementary material
Source: PubMed Central journal article supplement (PMC3089907)
Supplement: NIHMS273272-supplement-1.pdf [file NIHMS273272-supplement-1.pdf]

## Supplemental Figure I

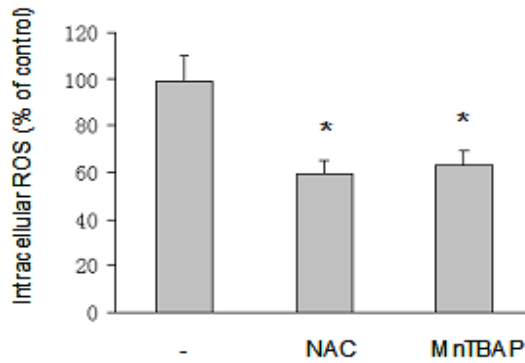

### Supplemental Figure I.

#### **Attenuation by NAC or MnTBAP of HKa-induced ROS production in EPCs.**

After EPCs were labeled with 10  $\mu$ M H<sub>2</sub>DCF-DA for 30 minutes, they were exposed to 100 nM HKa with PBS (-), 100  $\mu$ M NAC or 10  $\mu$ M MnTBAP for 12 hours. Mean channel fluorescence of H<sub>2</sub>DCF-DA was analyzed by flow cytometry. Results are expressed as percent of control. (\* $P$  < 0.01, v.s. PBS; n=3).
